# Supplementary material for: Synbiotic Combination of Djulis (Chenopodium formosanum) and Lactobacillus acidophilus Inhibits Colon Carcinogenesis in Rats
Source: PubMed Central journal article supplement (PMC7019357; doi:10.3390/nu12010103), 2019-12-30
Supplement: nutrients-12-00103-s001.pdf [file nutrients-12-00103-s001.pdf]

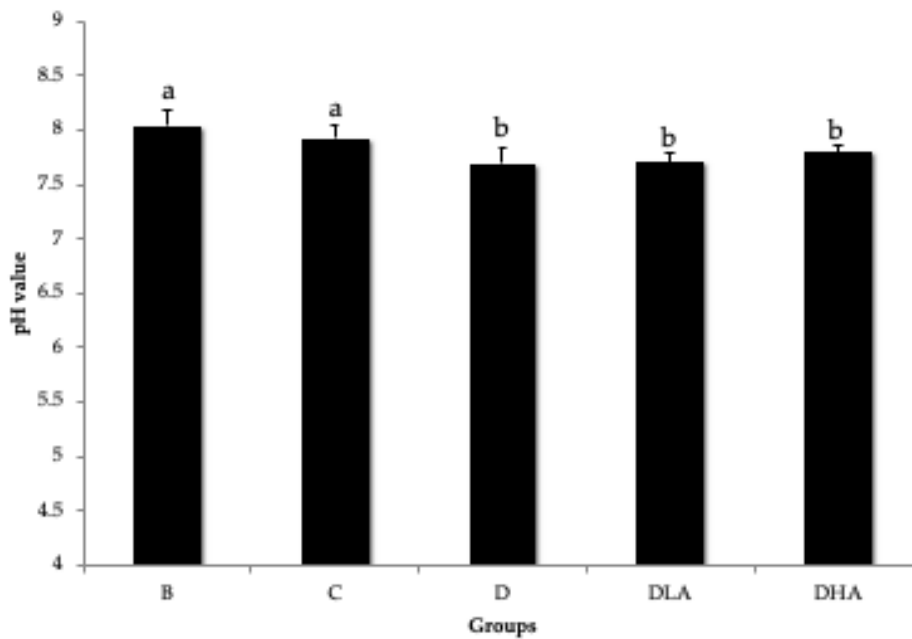

Supplementary Figure 1. Cecal pH value of F344 rats. All rats except those in group B were administered with DMH/DSS. B, AIN-93G diet; C, AIN-93G diet; D, AIN-93G containing 10% djulis; DLA, AIN-93G containing 10% djulis +  $5 \times 10^6$  cfu *L. acidophilus*/g; and DHA, AIN-93G containing 10% djulis +  $5 \times 10^7$  cfu *L. acidophilus*/g. Different letters above the error bars indicate a significant difference as determined by one-way ANOVA followed by Duncan's multiple-range test,  $p < 0.05$  ( $n = 12$ ).
